# Supplementary material for: Pre-Conditioning with IFN-γ and Hypoxia Enhances the Angiogenic Potential of iPSC-Derived MSC Secretome
Source: MDPI journal article supplement (doi:10.3390/cells11060988), 2022-03-14
Supplement: s1 [file s1]

## Supplementary figures

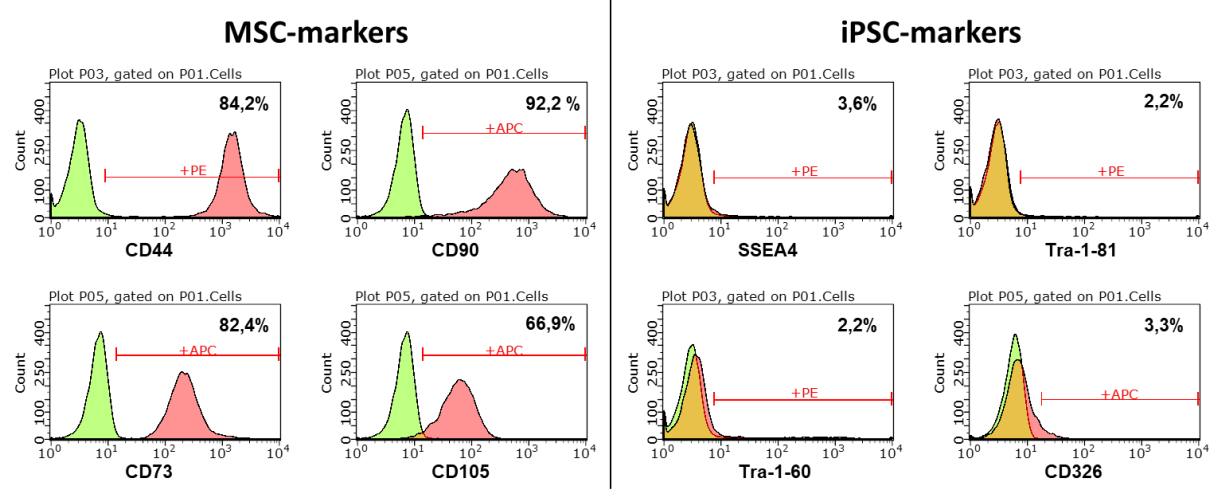

**Fig. S1 Representative histograms of MSC- and iPSC-surface marker expression by iMSCs of passage 3 (green = isotype control, red = surface marker). iMSCs show high expression of MSC-markers while iPSC-marker expression is downregulated.**

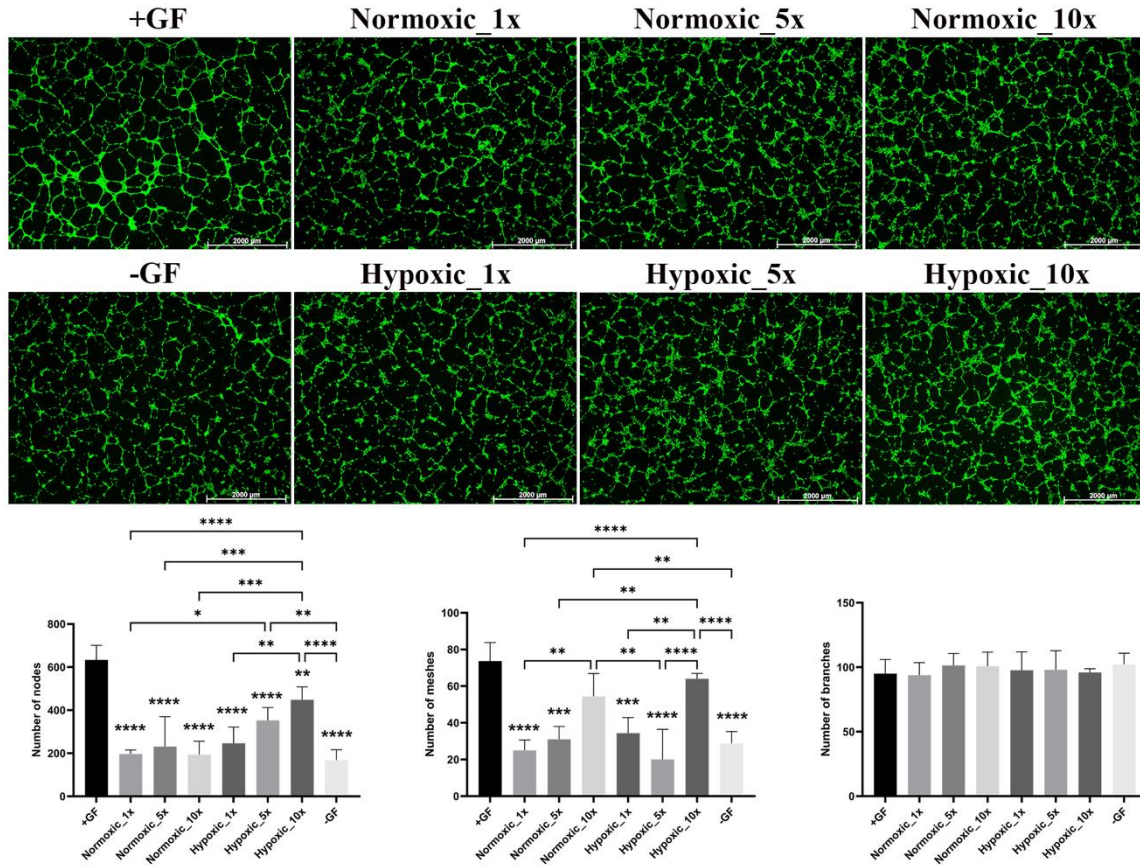

**Fig. S2 Tube formation of HUVECs incubated with different concentrations of iMSCs secretome.** HUVECs seeded on Geltrex matrix in medium containing different concentrations of iMSCs secretome, +GF (positive group), or without growth factors (-GF, negative group). Number of branches, number of meshes, and number of nodes were quantified with the ImageJ software. Values represent means  $\pm$  SEM from 3 independent experiments (\*, \*\*, \*\*\*, \*\*\*\* without bar indicates significant differences to the +GF group; \*  $p < 0.05$ , \*\*  $p < 0.01$ , \*\*\*  $p < 0.001$ , \*\*\*\*  $p < 0.0001$ ).

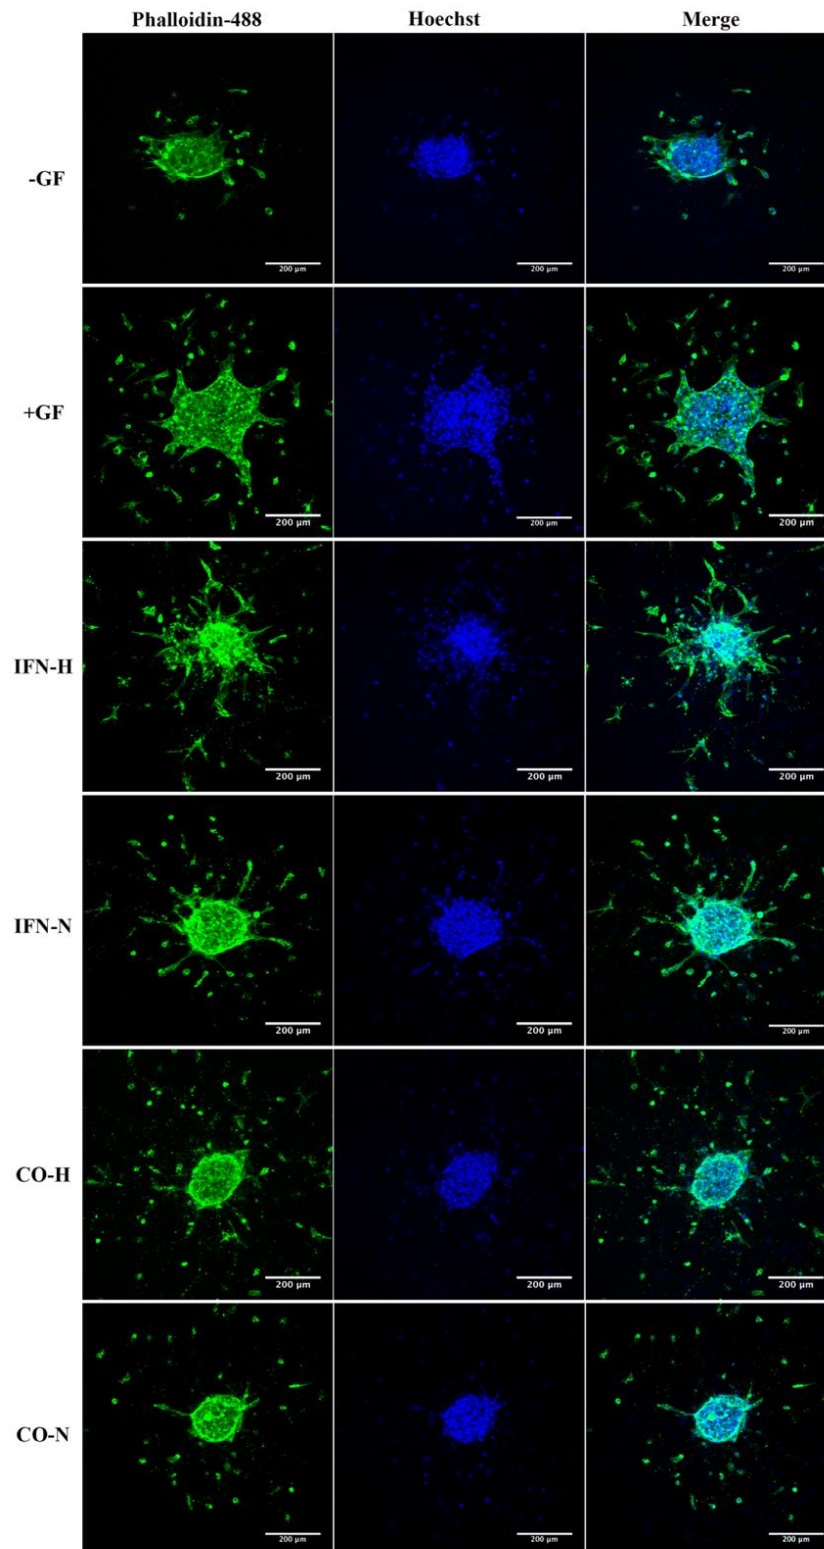

**Fig. S3 Sprout formation by 3D HUVEC spheroids cultured within coll/HA composites for 48 hours.** Representative confocal microscopic images (Alexa488-

Phalloidin staining) of HUVEC spheroids cultured within coll/HA composites comprising different conditioned iMSCs secretome in a 10x magnification (scale bar = 200  $\mu\text{m}$ ).
